# Supplementary material for: An online, public health framework supporting behaviour change to reduce dementia risk: interim results from the ISLAND study linking ageing and neurodegenerative disease
Source: PubMed Central journal article supplement (PMC10542675; doi:10.1186/s12889-023-16805-2), 2023-09-29
Supplement: 12889_2023_16805_MOESM1_ESM.pdf [file 12889_2023_16805_MOESM1_ESM.pdf]

## Additional File 1: ISLAND Change – interim results

### Contents

|                                                                                                                                                                                                         |   |
|---------------------------------------------------------------------------------------------------------------------------------------------------------------------------------------------------------|---|
| Table S1. Number of risk behaviours by time and number of exposures to the Dementia Risk Profile report.....                                                                                            | 2 |
| Table S2. Mean number of risk behaviours by time and number of exposures to the Dementia Risk Profile report, with and without engagement with the Preventing Dementia Massive Open Online Course ..... | 2 |
| Table S3. Probability of moving into a different level of risk (low, medium, high) for each domain of the Dementia Risk Profile, from baseline to 2022 .....                                            | 2 |
| Table S4. Probability of moving into a different level of risk (low, medium, high) for each domain of the Dementia Risk Profile, by PDMOOC engagement.....                                              | 5 |
| Supplementary Table S5: Descriptive summary data by timepoint for measures of dementia risk knowledge and motivations to change dementia risk behaviours .....                                          | 6 |
| Sample r code for linear regression models .....                                                                                                                                                        | 7 |
| Sample r code for multinomial regression models.....                                                                                                                                                    | 7 |
| Sample r code for mediation analyses.....                                                                                                                                                               | 8 |

Bartlett L, Bindoff A, Doherty K, Kim S, Eccleston C, Kitsos A, Roccati E, Alty J, King AE, Vickers JC. ***An online, public health framework supporting behaviour change to reduce dementia risk: interim results from the Island Study Linking Ageing and Neurodegenerative Disease.***

Submitted BMC Public Health March 2023. Accepted 21 September, 2023.

Find the published paper at <https://doi.org/10.1186/s12889-023-16805-2>

Table S1. Number of risk behaviours by time and number of exposures to the Dementia Risk Profile report.

| Months | Exposures | EMMEAN | SE    |
|--------|-----------|--------|-------|
| 0      | 1         | 2.164  | 0.022 |
| 12     | 2         | 1.745  | 0.020 |
| 24     | 3         | 1.650  | 0.019 |
| 36     | 4         | 1.601  | 0.024 |

EMMEAN and SE: estimated marginal means and standard errors from unadjusted linear mixed effects regression testing effects of the number of exposures to the personal Dementia Risk Profile report. Note: exposures also provide a proxy for time in the project, as the report is provided after completing baseline and then each annual survey.

Table S2. Number of risk behaviours by exposures to the Dementia Risk Profile report, with and without engagement with the Preventing Dementia Massive Open Online Course

| Months | Exposures | PDMOOC | EMMEAN | SE    |
|--------|-----------|--------|--------|-------|
| 0      | 1         | No     | 2.196  | 0.031 |
| 12     | 2         | No     | 1.800  | 0.028 |
| 24     | 3         | No     | 1.730  | 0.028 |
| 36     | 4         | No     | 1.704  | 0.035 |
| 0      | 1         | Yes    | 2.132  | 0.029 |
| 12     | 2         | Yes    | 1.689  | 0.026 |
| 24     | 3         | Yes    | 1.571  | 0.025 |
| 36     | 4         | Yes    | 1.498  | 0.030 |

EMMEAN and SE: estimated marginal means and standard errors from unadjusted linear mixed effects regression testing effects of the number of exposures to the personal Dementia Risk Profile report (PDMOOC= no) and the effects following engagement following the PDMOOC. Note: exposures also provide a proxy for time in the project, as the report is provided after completing baseline and then each annual survey.

Table S3. Probability of moving into a different level of risk (low, medium, high) for each domain of the Dementia Risk Profile, from baseline to 2022

| Risk factor         | Baseline risk level | 2022 risk level | Probability of change | SE    | 95%CI        | t ratio | p value |
|---------------------|---------------------|-----------------|-----------------------|-------|--------------|---------|---------|
| Alcohol consumption |                     |                 |                       |       |              |         |         |
|                     | low                 | low             | <b>0.828</b>          | 0.082 | 0.661 0.994  | 10.063  | < 0.001 |
|                     | low                 | medium          | 0.136                 | 0.082 | -0.030 0.302 | 1.656   | 0.106   |

|                           |        |        |              |       |        |       |         |         |
|---------------------------|--------|--------|--------------|-------|--------|-------|---------|---------|
|                           | low    | high   | <b>0.009</b> | 0.003 | 0.004  | 0.015 | 3.306   | 0.002   |
|                           | medium | low    | <b>0.270</b> | 0.054 | 0.161  | 0.379 | 5.015   | < 0.001 |
|                           | medium | medium | <b>0.661</b> | 0.054 | 0.551  | 0.771 | 12.188  | < 0.001 |
|                           | medium | high   | <b>0.037</b> | 0.007 | 0.023  | 0.050 | 5.385   | < 0.001 |
|                           | high   | low    | <b>0.106</b> | 0.036 | 0.032  | 0.179 | 2.915   | 0.006   |
|                           | high   | medium | <b>0.529</b> | 0.041 | 0.447  | 0.611 | 13.021  | < 0.001 |
|                           | high   | high   | <b>0.336</b> | 0.025 | 0.285  | 0.388 | 13.228  | < 0.001 |
| Blood pressure management |        |        |              |       |        |       |         |         |
|                           | low    | low    | <b>0.969</b> | 0.005 | 0.960  | 0.978 | 208.072 | < 0.001 |
|                           | low    | medium | <b>0.011</b> | 0.002 | 0.006  | 0.016 | 4.568   | < 0.001 |
|                           | low    | high   | <b>0.019</b> | 0.004 | 0.011  | 0.027 | 4.911   | < 0.001 |
|                           | medium | low    | <b>0.828</b> | 0.037 | 0.753  | 0.903 | 22.317  | < 0.001 |
|                           | medium | medium | <b>0.079</b> | 0.027 | 0.025  | 0.133 | 2.940   | 0.005   |
|                           | medium | high   | <b>0.094</b> | 0.031 | 0.032  | 0.155 | 3.064   | 0.004   |
|                           | high   | low    | <b>0.835</b> | 0.030 | 0.774  | 0.895 | 27.839  | < 0.001 |
|                           | high   | medium | <b>0.054</b> | 0.018 | 0.017  | 0.091 | 2.947   | 0.005   |
|                           | high   | high   | <b>0.111</b> | 0.027 | 0.057  | 0.165 | 4.159   | < 0.001 |
| Body mass index           |        |        |              |       |        |       |         |         |
|                           | low    | low    | <b>0.877</b> | 0.041 | 0.793  | 0.961 | 21.156  | < 0.001 |
|                           | low    | medium | <b>0.116</b> | 0.041 | 0.032  | 0.199 | 2.794   | 0.008   |
|                           | low    | high   | <b>0.007</b> | 0.002 | 0.003  | 0.011 | 3.281   | 0.002   |
|                           | medium | low    | 0.183        | 0.103 | -0.025 | 0.391 | 1.779   | 0.083   |
|                           | medium | medium | <b>0.757</b> | 0.103 | 0.548  | 0.965 | 7.345   | < 0.001 |
|                           | medium | high   | <b>0.061</b> | 0.007 | 0.046  | 0.075 | 8.264   | < 0.001 |
|                           | high   | low    | 0.040        | 0.049 | -0.058 | 0.139 | 0.829   | 0.412   |
|                           | high   | medium | <b>0.442</b> | 0.051 | 0.338  | 0.545 | 8.615   | < 0.001 |
|                           | high   | high   | <b>0.515</b> | 0.016 | 0.481  | 0.548 | 31.213  | < 0.001 |
| Cholesterol management    |        |        |              |       |        |       |         |         |
|                           | low    | low    | <b>0.927</b> | 0.028 | 0.870  | 0.984 | 32.949  | < 0.001 |
|                           | low    | medium | <b>0.017</b> | 0.003 | 0.012  | 0.023 | 6.064   | < 0.001 |
|                           | low    | high   | 0.056        | 0.028 | -0.001 | 0.112 | 1.990   | 0.054   |
|                           | medium | low    | <b>0.691</b> | 0.091 | 0.507  | 0.875 | 7.600   | < 0.001 |
|                           | medium | medium | <b>0.129</b> | 0.027 | 0.075  | 0.183 | 4.803   | < 0.001 |
|                           | medium | high   | <b>0.180</b> | 0.088 | 0.001  | 0.358 | 2.038   | 0.048   |
|                           | high   | low    | <b>0.640</b> | 0.103 | 0.433  | 0.848 | 6.236   | < 0.001 |
|                           | high   | medium | <b>0.044</b> | 0.009 | 0.026  | 0.062 | 4.863   | < 0.001 |
|                           | high   | high   | <b>0.316</b> | 0.103 | 0.108  | 0.523 | 3.075   | 0.004   |
| Cognitive activity        |        |        |              |       |        |       |         |         |
|                           | low    | low    | <b>0.927</b> | 0.008 | 0.910  | 0.944 | 119.503 | < 0.001 |
|                           | low    | high   | <b>0.073</b> | 0.008 | 0.056  | 0.090 | 9.393   | < 0.001 |
|                           | high   | low    | <b>0.701</b> | 0.014 | 0.670  | 0.732 | 50.292  | < 0.001 |
|                           | high   | high   | <b>0.299</b> | 0.014 | 0.268  | 0.330 | 21.436  | < 0.001 |

|                              |        |              |        |        |       |         |         |  |
|------------------------------|--------|--------------|--------|--------|-------|---------|---------|--|
| Diabetes management          |        |              |        |        |       |         |         |  |
| low                          | low    | <b>0.820</b> | 0.086  | 0.647  | 0.994 | 9.576   | < 0.001 |  |
| low                          | medium | <b>0.012</b> | 0.004  | 0.004  | 0.020 | 3.112   | 0.003   |  |
| low                          | high   | 0.166        | 0.086  | -0.007 | 0.339 | 1.939   | 0.060   |  |
| medium                       | low    | <b>0.658</b> | 0.124  | 0.407  | 0.908 | 5.315   | < 0.001 |  |
| medium                       | medium | 0.090        | 0.047  | -0.005 | 0.186 | 1.910   | 0.063   |  |
| medium                       | high   | <b>0.252</b> | 0.116  | 0.018  | 0.486 | 2.177   | 0.036   |  |
| high                         | low    | <b>0.536</b> | 0.062  | 0.410  | 0.661 | 8.630   | < 0.001 |  |
| high                         | medium | 0.013        | 0.007  | 0.000  | 0.026 | 1.984   | 0.054   |  |
| high                         | high   | <b>0.451</b> | 0.062  | 0.326  | 0.577 | 7.289   | < 0.001 |  |
| Mediterranean diet adherence |        |              |        |        |       |         |         |  |
| low                          | low    | <b>0.692</b> | 0.039  | 0.613  | 0.770 | 17.747  | < 0.001 |  |
| low                          | medium | <b>0.300</b> | 0.039  | 0.221  | 0.379 | 7.710   | < 0.001 |  |
| low                          | high   | 0.000        | 0.000  | 0.000  | 0.000 | 0.991   | 0.328   |  |
| medium                       | low    | <b>0.234</b> | 0.077  | 0.078  | 0.389 | 3.033   | 0.004   |  |
| medium                       | medium | <b>0.613</b> | 0.074  | 0.464  | 0.762 | 8.314   | < 0.001 |  |
| medium                       | high   | 0.153        | 0.089  | -0.026 | 0.333 | 1.730   | 0.092   |  |
| high                         | low    | <b>0.000</b> | 0.000  | 0.000  | 0.000 | 2.038   | 0.048   |  |
| high                         | medium | <b>0.405</b> | 0.040  | 0.324  | 0.487 | 10.053  | < 0.001 |  |
| high                         | high   | <b>0.588</b> | 0.040  | 0.507  | 0.670 | 14.614  | < 0.001 |  |
| Physical activity            |        |              |        |        |       |         |         |  |
| low                          | low    | <b>0.979</b> | 0.004  | 0.970  | 0.988 | 240.920 | < 0.001 |  |
| low                          | high   | <b>0.021</b> | 0.004  | 0.012  | 0.030 | 5.255   | < 0.001 |  |
| high                         | low    | <b>0.821</b> | 0.0267 | 0.762  | 0.890 | 30.810  | < 0.001 |  |
| high                         | high   | <b>0.179</b> | 0.027  | 0.120  | 0.238 | 6.712   | < 0.001 |  |
| Smoking                      |        |              |        |        |       |         |         |  |
| low                          | low    | <b>0.996</b> | 0.001  | 0.994  | 0.999 | 834.259 | < 0.001 |  |
| low                          | medium | <b>0.002</b> | 0.001  | 0.000  | 0.004 | 2.425   | 0.020   |  |
| low                          | high   | 0.001        | 0.001  | 0.000  | 0.003 | 1.605   | 0.117   |  |
| medium                       | low    | <b>0.806</b> | 0.050  | 0.705  | 0.907 | 16.096  | < 0.001 |  |
| medium                       | medium | <b>0.159</b> | 0.043  | 0.072  | 0.246 | 3.685   | < 0.001 |  |
| medium                       | high   | 0.035        | 0.028  | -0.021 | 0.092 | 1.269   | 0.212   |  |
| high                         | low    | <b>0.491</b> | 0.058  | 0.373  | 0.609 | 8.445   | < 0.001 |  |
| high                         | medium | 0.033        | 0.018  | -0.003 | 0.069 | 1.837   | 0.074   |  |
| high                         | high   | <b>0.476</b> | 0.060  | 0.354  | 0.598 | 7.895   | < 0.001 |  |

Probability of Change: using multinomial logistic regression we estimated the probability of transition from risk state in baseline data (provided between October 2019 and June 2022) to risk state in October 2022; bold text denotes statistical significance with  $\alpha=0.05$ . Results are averaged over PDMOOC, age, sex, education and socioeconomic status.

Please refer to the ISLAND Protocol paper for scoring criteria. <http://dx.doi.org/10.2196/34688>

Table S4. Probability of moving into a different level of risk (low, medium, high) for each domain of the Dementia Risk Profile, by PDMOOC engagement

| Risk behaviour                      | PDMOOC exposed | 2022 risk level | Probability of change | 95%CI  |        | p value | Effect of PDMOOC  |
|-------------------------------------|----------------|-----------------|-----------------------|--------|--------|---------|-------------------|
| <b>Alcohol consumption</b>          |                |                 |                       |        |        |         |                   |
|                                     | Yes - No       | high            | -0.003                | -0.026 | 0.019  | 0.776   | 0.3% fewer        |
|                                     | Yes - No       | medium          | 0.000                 | -0.036 | 0.036  | 0.997   | 0.0% more         |
|                                     | Yes - No       | low             | 0.010                 | -0.023 | 0.043  | 0.547   | 1.0% more         |
| <b>Blood pressure management</b>    |                |                 |                       |        |        |         |                   |
|                                     | Yes - No       | high            | -0.003                | -0.023 | 0.017  | 0.772   | 0.3% fewer        |
|                                     | Yes - No       | medium          | -0.004                | -0.021 | 0.012  | 0.581   | 0.4% fewer        |
|                                     | Yes - No       | low             | 0.008                 | -0.015 | 0.031  | 0.508   | 0.8% more         |
| <b>Body mass index</b>              |                |                 |                       |        |        |         |                   |
|                                     | Yes - No       | high            | -0.019                | -0.040 | 0.003  | 0.094   | 1.9% fewer        |
|                                     | Yes - No       | medium          | 0.002                 | -0.030 | 0.035  | 0.879   | 0.2% more         |
|                                     | Yes - No       | low             | 0.016                 | -0.016 | 0.048  | 0.323   | 1.6% more         |
| <b>Cholesterol management</b>       |                |                 |                       |        |        |         |                   |
|                                     | Yes - No       | high            | -0.041                | -0.085 | 0.003  | 0.065   | 4.1% fewer        |
|                                     | Yes - No       | medium          | 0.015                 | -0.006 | 0.036  | 0.150   | 1.5% more         |
|                                     | Yes - No       | low             | 0.026                 | -0.020 | 0.073  | 0.258   | 2.6% more         |
| <b>Cognitive activity</b>           |                |                 |                       |        |        |         |                   |
|                                     | Yes - No       | low             | -0.002                | -0.027 | 0.024  | 0.890   | 0.2% fewer        |
|                                     | Yes - No       | high            | 0.002                 | -0.024 | 0.027  | 0.890   | 0.2% more         |
| <b>Diabetes management</b>          |                |                 |                       |        |        |         |                   |
|                                     | Yes - No       | high            | <b>-0.046</b>         | -0.085 | -0.006 | 0.024   | <b>4.6% fewer</b> |
|                                     | Yes - No       | medium          | 0.007                 | -0.010 | 0.024  | 0.441   | 0.7% more         |
|                                     | Yes - No       | low             | 0.039                 | -0.003 | 0.082  | 0.066   | 3.9% more         |
| <b>Mediterranean diet adherence</b> |                |                 |                       |        |        |         |                   |
|                                     | Yes - No       | high            | -0.038                | -0.084 | 0.008  | 0.104   | 3.8% fewer        |
|                                     | Yes - No       | medium          | -0.004                | -0.043 | 0.034  | 0.815   | 0.4% fewer        |
|                                     | Yes - No       | low             | <b>0.043</b>          | 0.011  | 0.075  | 0.010   | <b>4.3% more</b>  |
| <b>Physical activity</b>            |                |                 |                       |        |        |         |                   |
|                                     | Yes - No       | low             | 0.025                 | -0.007 | 0.056  | 0.111   | 2.5% more         |
|                                     | Yes - No       | high            | -0.025                | -0.056 | 0.007  | 0.111   | 2.5% fewer        |
| <b>Smoking</b>                      |                |                 |                       |        |        |         |                   |
|                                     | Yes - No       | high            | 0.043                 | -0.003 | 0.088  | 0.064   | 4.3% more         |
|                                     | Yes - No       | medium          | <b>-0.047</b>         | -0.081 | -0.013 | 0.008   | <b>4.7% fewer</b> |
|                                     | Yes - No       | low             | 0.005                 | -0.047 | 0.057  | 0.856   | 0.5% more         |

Results from multinomial models are averaged over age, sex, educational attainment and area-based Index of Relative Socio-economic Advantage and Disadvantage. Probability of change contrast analysis: PDMOOC engaged vs not; bold text denotes statistical significance with  $\alpha=0.05$ . Please refer to the ISLAND Protocol paper for scoring criteria. <http://dx.doi.org/10.2196/34688>

Supplementary Table S5: Descriptive summary data by timepoint for measures of dementia risk knowledge and motivations to change dementia risk behaviours

| <b>Outcome variable</b>                               | <b>BL</b>         | <b>Oct-20</b>     | <b>Oct-21</b>     | <b>Oct-22</b>     |
|-------------------------------------------------------|-------------------|-------------------|-------------------|-------------------|
| <b>Dementia risk literacy</b>                         | n=3038            | n=2010            | n=2136            | n=3001            |
| General knowledge                                     |                   |                   |                   |                   |
| Mean (SD)                                             | 12.4 (4.05)       | 13.9 (4.13)       | 13.6 (4.20)       | 13.8 (4.15)       |
| Median [Min, Max]                                     | 12.0 [1.00, 22.0] | 13.0 [2.00, 22.0] | 13.0 [0, 22.0]    | 13.0 [2.00, 22.0] |
| Correct attributions                                  |                   |                   |                   |                   |
| Mean (SD)                                             | 12.0 (5.14)       | 13.9 (4.63)       | 18.0 (5.96)       | 18.2 (6.18)       |
| Median [Min, Max]                                     | 11.0 [0, 28.0]    | 13.0 [0, 20.0]    | 17.0 [0, 28.0]    | 18.0 [0, 28.0]    |
| Misconceptions                                        |                   |                   |                   |                   |
| Mean (SD)                                             | 1.94 (2.37)       | 2.89 (2.81)       | 2.90 (2.82)       | 2.59 (2.74)       |
| Median [Min, Max]                                     | 1.00 [0, 12.0]    | 2.00 [0, 12.0]    | 2.00 [0, 12.0]    | 2.00 [0, 12.0]    |
| <b>Motivations to change dementia risk behaviours</b> | n=3038            | n=1972            | n=2125            | n=2987            |
| Susceptibility                                        |                   |                   |                   |                   |
| Mean (SD)                                             | 10.8 (2.74)       | 10.3 (2.74)       | 10.5 (2.77)       | 10.5 (2.81)       |
| Median [Min, Max]                                     | 11.0 [4.00, 20.0] | 10.0 [4.00, 20.0] | 11.0 [4.00, 20.0] | 11.0 [4.00, 20.0] |
| Severity                                              |                   |                   |                   |                   |
| Mean (SD)                                             | 15.5 (3.01)       | 15.1 (3.05)       | 15.2 (2.95)       | 15.3 (3.03)       |
| Median [Min, Max]                                     | 15.0 [5.00, 25.0] | 15.0 [5.00, 25.0] | 15.0 [5.00, 25.0] | 15.0 [5.00, 25.0] |
| Benefits                                              |                   |                   |                   |                   |
| Mean (SD)                                             | 15.0 (1.92)       | 15.2 (2.03)       | 15.2 (2.05)       | 15.2 (2.05)       |
| Median [Min, Max]                                     | 15.0 [8.00, 20.0] | 15.0 [5.00, 20.0] | 15.0 [6.00, 20.0] | 15.0 [4.00, 20.0] |
| Barriers                                              |                   |                   |                   |                   |
| Mean (SD)                                             | 8.21 (2.26)       | 8.31 (2.26)       | 8.43 (2.25)       | 8.59 (2.41)       |
| Median [Min, Max]                                     | 8.00 [4.00, 20.0] | 8.00 [4.00, 18.0] | 8.00 [4.00, 17.0] | 8.00 [4.00, 20.0] |
| Cues to action                                        |                   |                   |                   |                   |
| Mean (SD)                                             | 13.0 (2.38)       | 13.0 (2.44)       | 12.9 (2.39)       | 13.1 (2.43)       |
| Median [Min, Max]                                     | 13.0 [4.00, 20.0] | 13.0 [4.00, 20.0] | 13.0 [4.00, 20.0] | 13.0 [4.00, 20.0] |
| Health motivation                                     |                   |                   |                   |                   |
| Mean (SD)                                             | 15.4 (2.09)       | 15.3 (2.08)       | 15.2 (2.11)       | 15.3 (2.14)       |
| Median [Min, Max]                                     | 15.0 [7.00, 20.0] | 15.0 [8.00, 20.0] | 15.0 [8.00, 20.0] | 15.0 [6.00, 20.0] |
| Self-efficacy                                         |                   |                   |                   |                   |
| Mean (SD)                                             | 7.72 (1.17)       | 7.79 (1.19)       | 7.75 (1.19)       | 7.70 (1.22)       |
| Median [Min, Max]                                     | 8.0 [3.0, 10.0]   | 8.0 [2.0, 10.0]   | 8.0 [2.0, 10.0]   | 8.0 [2.0, 10.0]   |

---

BL: baseline completed between Oct 2019 and June 2022; Oct-20: data from sample with BL prior to August 2020 and 2020 survey data; Oct-21: data from sample with BL prior to August 2021 and 2021 survey data; Oct-22: data from sample with BL prior to August 2022 and survey data in 2022. Dementia Risk Literacy measured using the Knowledge of Dementia Risk Reduction scale<sup>1</sup>; Motivations to change dementia risk behaviours measured using the Motivations the Change Lifestyle and Behaviours for Dementia Risk Reduction scale<sup>2</sup>

### Sample r code for linear regression models

##### Estimate direction and magnitude of associations between intervention exposures and outcome variables (sample code shows DRP change)

```
#unadjusted model (no mooc)
m0 <- lmer(DRP_total_all ~ exposures + log(t_months+1) + (1+exposures|UID), data = d)

#unadjusted model - effect of mooc

m1 <- lmer(DRP_total_all ~ exposures*mooc + log(t_months+1) + (1+exposures|UID), data = d)

# covariate adjusted model

m2 <- lmer(DRP_total_all ~ exposures*mooc +
           log(t_months+1) +
           age +
           gender +
           BACKGROUND_marital_cat +
           BACKGROUND_education_cat +
           IRSAD_Decile
           + (1+exposures|UID), data = d)
```

### Sample r code for multinomial regression models

##### Estimate matrix of transition probabilities across risk levels in each DRP domain, with and without contrast for intervention exposures. (Sample shows code for alcohol tests.)

```
Packages: lmerTest3 lme4 and emmeans5

#Calculate the omnibus statistic for the change from BL to Oct22 (participation in ISLAND,
including first exposure to DRP)
```

---

<sup>1</sup> Eccleston C, Kitsos A, Doherty K. Assessing dementia risk reduction knowledge: development of the KoDeRR instrument (Conference Paper). In: Alzheimer's Disease International, editor. 35th Global Conference of Alzheimer's Disease International: New horizons in dementia. London 2022.

<sup>2</sup> Kim S, Sargent-Cox K, Cherbuin N, Anstey KJ. Development of the motivation to change lifestyle and health behaviours for dementia risk reduction scale. *Dementia and Geriatric Cognitive Disorders Extra*. 2014;4(2):172-83.

<sup>3</sup> Kuznetsova A, Brockhoff PB, Christensen RHB. lmerTest Package: Tests in Linear Mixed Effects Models. *Journal of Statistical Software*. 2017;82(13):1 - 26. 10.18637/jss.v082.i13

<sup>4</sup> Bates D, Mächler M, Bolker B, Walker S. Fitting Linear Mixed-Effects Models Using lme4. *Journal of Statistical Software*. 2015;67(1):1 - 48. 10.18637/jss.v067.i01

<sup>5</sup> Searle SR, Speed FM, Milliken GA. Population Marginal Means in the Linear Model: An Alternative to Least Squares Means. *The American Statistician*. 1980;34(4):216-21. 10.1080/00031305.1980.10483031

```

a <- anova(m2, multinom(alc_Oct22 ~ mooc + age + gender + BACKGROUND_education_cat +
  IRSAD_Decile, data = w %>%
    filter(!is.na(alc_BL)), Hess = TRUE, trace = FALSE))
a1 <- a[2,] %>% mutate(stat = round(`LR stat.`), prob = case_when(`Pr(Chi)` == 0 ~ "< 0.001",
  `Pr(Chi)` < 0.001 ~ "< 0.001",
  TRUE ~ format(round(`Pr(Chi)`, 3), nsmall = 3)))
## adjusted model
m2 <- multinom(alc_Oct22 ~ alc_BL + mooc + age + gender + BACKGROUND_education_cat +
  IRSAD_Decile, data = w, Hess = TRUE, trace = FALSE)
### contrast – bl to 2022 - mooc not included
em <- emmeans(m2, pairwise ~ alc_Oct22|alc_BL, at = list(alc_BL = c('low', 'medium', 'high')))
em1 <- as.data.frame(em$emmeans)
em_p <- as.data.frame(test(em$emmeans))
em2 <- left_join(em1, em_p)
probabilities_NO_MOOC <- em2 %>%
  magrittr::set_names(c("October 2022 Risk", "Baseline Risk", "prob", "SE",
    "df", "lower_CI", "upper_CI", "t_ratio", "p_value")) %>%
  mutate(phenotype = "alcohol")

```

Sample r code for mediation analyses

##### Estimate the mediating role of process variables (knowledge, motivations) on change in DRP by PDMOOC engagement. (Sample code uses the misconceptions dimension from the Knowledge of Dementia Risk Reduction (KoDERR) scale.)

```

Packages = lavaan6
# Model 1: Tested the mediating role of knowledge on the path between PDMOOC and DRP.
m1 <- 'DRP_z_Oct22 ~ DRP_z_BL + c1*mooc + b1*knowledge_Oct22
  KODERR_Oct22 ~ knowledge_BL + a1*mooc
  ind := a1*b1
  pmed := a1*b1/(c1 + a1*b1)'
# fit a "full information maximum likelihood" SEM
fit1 <- sem(m1, data = w, meanstructure = TRUE, se = 'bootstrap', missing = 'ml', bootstrap =
  5000L)

```

---

<sup>6</sup> Rosseel Y. lavaan: An R Package for Structural Equation Modeling. Journal of Statistical Software. 2012;48(2):1-36.
